# Supplementary material
Source: Springer Nature journal article supplement (https://www.springermedizin.de/resource/supplementary/12865_2009_287_MOESM6_ESM.pdf/9427742)

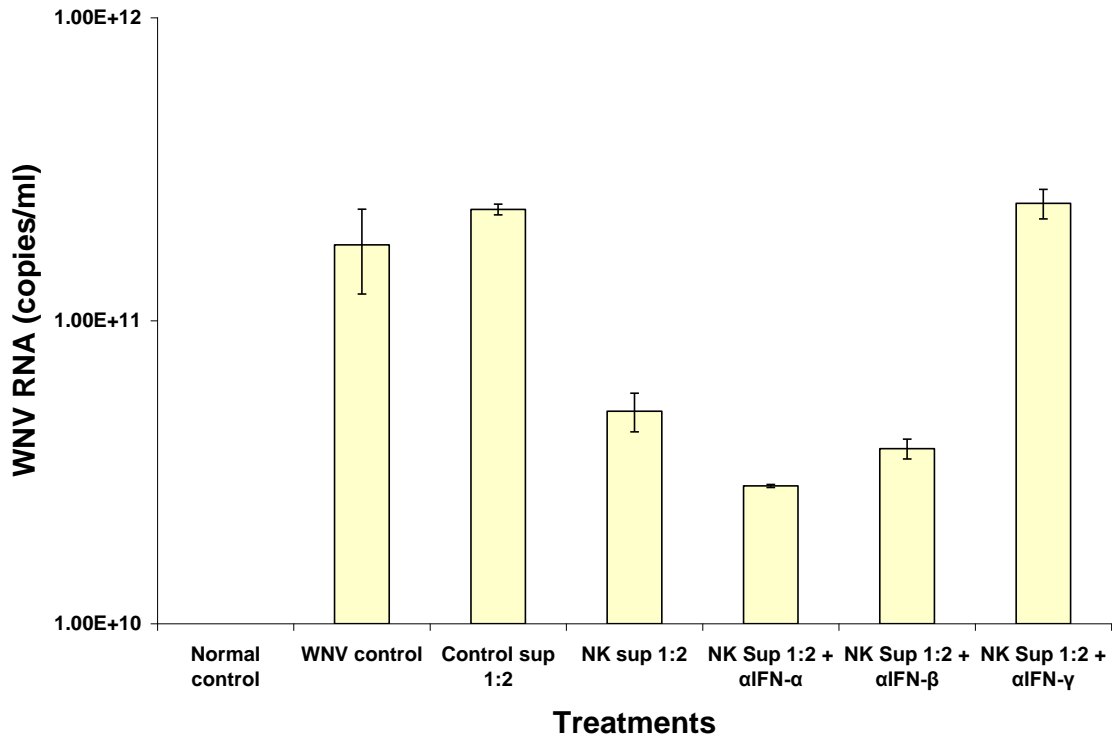

Supplement: MOESM6 [file 9427742]
